# Supplementary material
Source: PubMed Central journal article supplement (PMC2915837)
Supplement: NIHMS206972-supplement-Supplementary_Table_1.pdf [file NIHMS206972-supplement-Supplementary_Table_1.pdf]

Supplementary Table 1

| rs                | position | Distance (bp) | Hap allele | Saccone <i>et al</i> | Bierut <i>et al</i> | Zeiger <i>et al</i><br>CADD | Add Health | Greenbaum <i>et al</i> | Current study |
|-------------------|----------|---------------|------------|----------------------|---------------------|-----------------------------|------------|------------------------|---------------|
| rs10958726        | 42655066 | 12330         | T          | <b>T</b>             |                     |                             |            |                        |               |
| rs1530847         | 42667396 | 1408          |            |                      | <b>T</b>            |                             |            |                        |               |
| rs1955185         | 42668804 | 335           |            |                      | <b>T</b>            |                             |            |                        |               |
| rs13277254        | 42669139 | 35            | G          |                      | <b>A</b>            |                             |            |                        |               |
| rs13280301        | 42669174 | 40            |            |                      | <b>G</b>            |                             |            |                        |               |
| rs13277524        | 42669214 | 441           |            |                      | <b>T</b>            |                             |            |                        |               |
| rs6474412         | 42669655 | 566           |            |                      | <b>T</b>            |                             |            |                        |               |
| rs6474413         | 42670221 | 97            |            | <b>T</b>             |                     |                             |            |                        |               |
| <b>rs7004381</b>  | 42670318 | 1472          | G          |                      |                     |                             |            |                        | G             |
| <b>rs4950</b>     | 42671790 | 6953          |            |                      |                     | <b>G</b>                    | <b>G</b>   |                        | <b>A</b>      |
| <b>rs13280604</b> | 42678743 | 750           | A          |                      |                     | <b>G</b>                    | <b>A</b>   |                        | <b>A</b>      |
| rs6474414         | 42679493 | 26729         |            |                      |                     |                             |            | NS                     |               |
| rs4952            | 42706222 | 594           | G          | C                    |                     |                             |            |                        |               |
| <b>rs4953</b>     | 42706816 | 18332         | C          | G                    |                     | C                           |            |                        | G             |
| rs9298628         | 42725148 | 195           | C          | C                    |                     |                             |            |                        |               |
| rs9298629         | 42725343 | 1611          | G          |                      | G                   |                             |            | 0.035                  |               |
| rs16891576        | 42726954 | 402           |            |                      |                     |                             |            |                        |               |
| <b>rs2304297</b>  | 42727356 | 1652          | G          | <b>G</b>             |                     | G                           | G          | NS                     | <b>G</b>      |
| <b>rs35389610</b> | 42729008 | 1151          |            |                      |                     | NS                          |            |                        | NS            |
| rs16891583*       | 42730159 | 3376          |            | NA                   |                     |                             |            |                        |               |
| <b>rs892413</b>   | 42733535 | 2490          | C          |                      | C                   | NS                          | NS         |                        | NS            |
| rs10087172*       | 42736025 | 1578          | T          |                      | T                   |                             |            |                        |               |
| rs2217732         | 42737603 | 1555          | A          |                      |                     |                             |            | NS                     |               |
| <b>rs1072003</b>  | 42739158 | 9313          | C          |                      | C                   | NS                          |            | 0.053                  | NS            |
| rs7828365         | 42748471 |               |            |                      | C                   |                             |            |                        |               |

SNPs highlighted in bold are those genotyped in this study. Individual risk alleles are shown in bold based on two different significance level cut-offs. For the large genomewide and candidate gene studies (Saccone *et al*, Bierut *et al*), SNP achieving  $p < 0.01$  are in bold, others are  $0.01 > p > 0.10$  and presented only in the context of illustrating putative “risk” allele. For the other studies, SNPs with  $p < 0.05$  are shown in bold, while others are  $0.05 < p < 0.01$ . From the Greenbaum *et al* paper, we were unable to determine the risk allele, so p-values are presented. \*SNPS indicated with an asterisk are monomorphic in the samples studied.

NS – not significant

NA – not applicable
